# Supplementary material
Source: MDPI journal article supplement (https://www.mdpi.com/2073-4360/9/7/302)
Supplement: s1 [file s1]

Enable 3D View
