# Supplementary figures and images for: Two-Photon-Induced Microstereolithography of Chitosan-g-Oligolactides as a Function of Their Stereochemical Composition
Source: MDPI journal article supplement (doi:10.3390/polym9070302), 2017-07-24

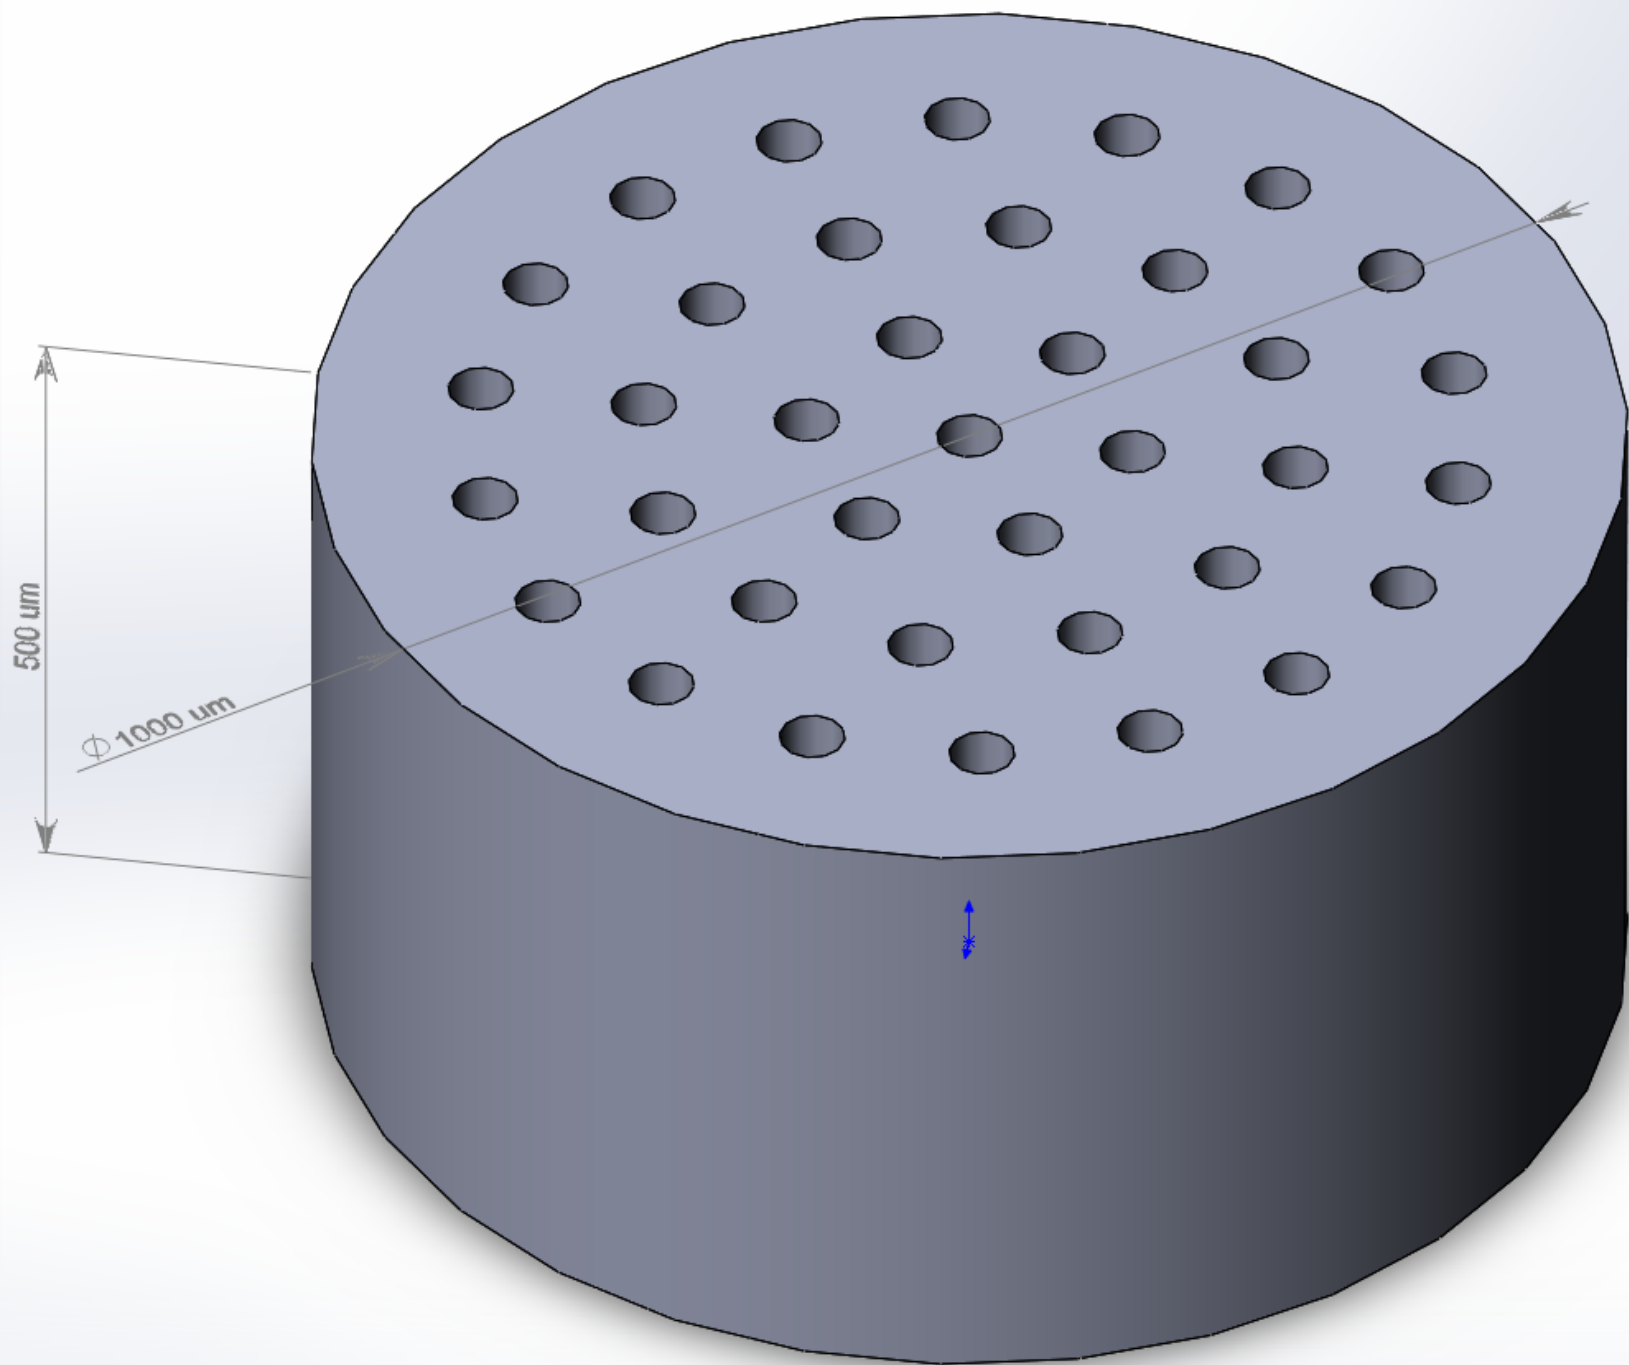

Supplement: s1 [file s1]
